# Supplementary material for: Spatially controlled diffusion range of tumor-associated angiogenic factors to develop a tumor model using a microfluidic resistive circuit
Source: Royal Society of Chemistry journal article supplement (doi:10.1039/d3lc00891f), 2024-01-01
Supplement: d3lc00891f1.pdf [file d3lc00891f1.pdf]

## Spatially controlled diffusion range of tumor-associated angiogenic factors to develop a tumor model using a microfluidic resistive circuit

Yu-Hsiang Hsu<sup>1,2\*</sup>, Wen-Chih Yang<sup>1</sup>, Yi-Ting Chen<sup>1</sup>, Che-Yu Lin<sup>1</sup>, Chiou-Fong Yang<sup>1</sup>, Wei-Wen Liu<sup>3</sup>, Subhashree Shivani<sup>4</sup>, Pai-Chi Li<sup>4</sup>

<sup>1</sup>Institute of Applied Mechanics, National Taiwan University, No. 1, Sec.4, Roosevelt Rd., Taipei 10617, Taiwan (R.O.C).  
[yhhsu@iam.ntu.edu.tw](mailto:yhhsu@iam.ntu.edu.tw).

<sup>2</sup>Graduate School of Advanced Technology, National Taiwan University, No. 1, Sec.4, Roosevelt Rd., Taipei 10617, Taiwan (R.O.C).  
Graduate Institute of Oral Biology, National Taiwan University, No. 1, Sec.4, Roosevelt Rd., Taipei 10617, Taiwan (R.O.C).

<sup>4</sup>Institute of Biomedical Electronics and Bioinformatics, National Taiwan University, No. 1, Sec.4, Roosevelt Rd., Taipei, 10617, Taiwan (R.O.C).

### Supplementary information

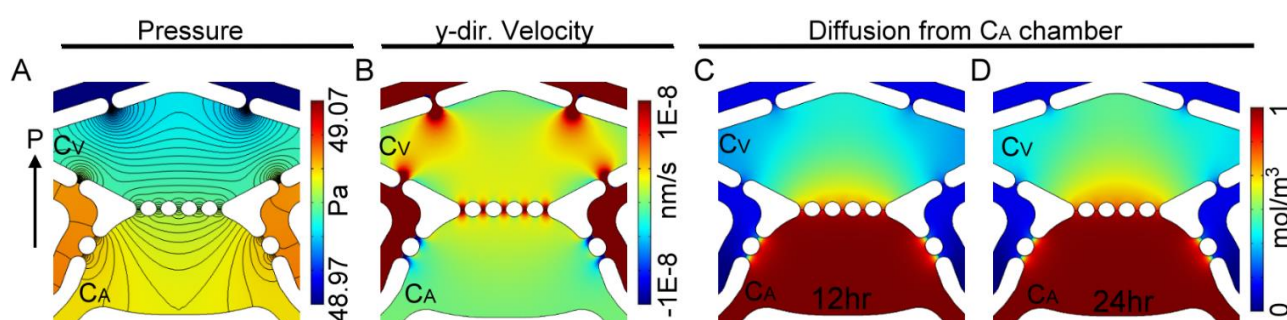

**Figure S1.** Simulation results of the DC-MPS device with a reversed pressure application: pressure distribution (A), diffusion patterns of dextran diffused from microchannels (B), diffusion patterns of dextran diffused from the  $C_A$  chamber at 12-hr (C) and 24-hr (D).

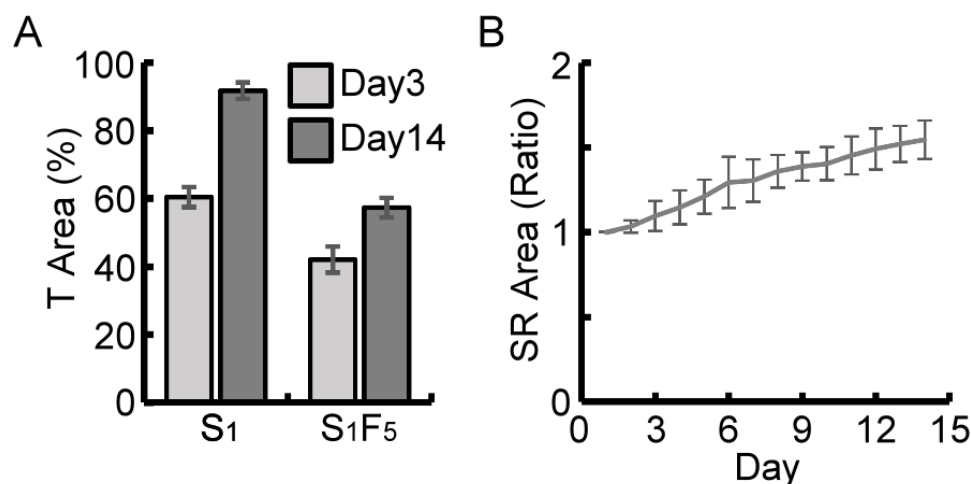

**Figure S2.** Statistical analysis on the growth of the SW480 tumor developed from cell suspensions of S1 ( $h_7h_{14}$ ) and S1F5 ( $h_7h_{14}$ ) conditions (A) and from a tumor spheroid (SR) (B).

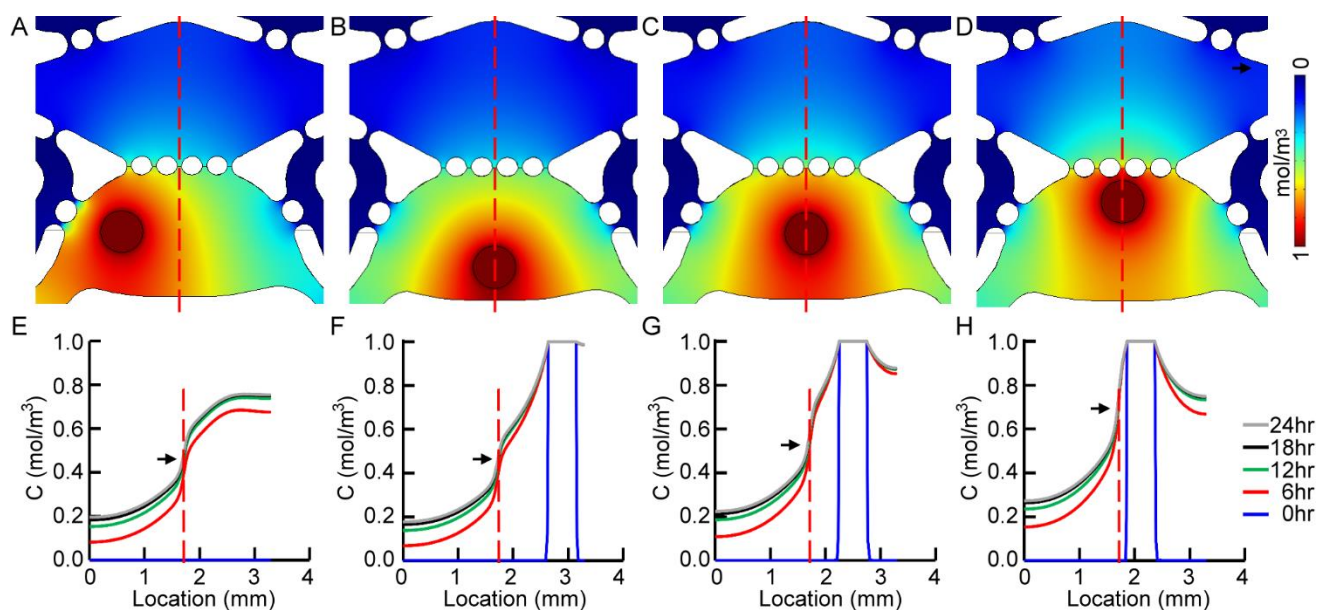

**Figure S3.** Simulated concentration profiles of molecules released from a tumor spheroid toward the  $C_V$  chamber 24 hours after loading, where the tumor spheroid is located in the left (A), bottom (B), middle (C), and top (D) regions of the  $C_A$  chamber. The corresponding concentration profiles at 0, 6, 12, 18, and 24 hours along with the red dashed lines are in (E-H). (scale bar = 500  $\mu\text{m}$ ).
